# Supplementary material for: Modeling congenital cataract in vitro using patient-specific induced pluripotent stem cells
Source: PubMed Central journal article supplement (PMC8486789; doi:10.1038/s41536-021-00171-x), 2021-10-01
Supplement: 41536_2021_171_MOESM1_ESM.pdf [file 41536_2021_171_MOESM1_ESM.pdf]

1 **Supplementary Information**

2

3 **Supplementary Figure 1. Characterization of the iPSCs derived from proband**  
4 **1 and proband 2.**

5 **Supplementary Figure 2. Comparative analysis of the differentiation process of**  
6 **the normal, *CRYGD*-, and *CRYBB2*-mutated lentoid bodies (LBs) during the**  
7 **early-middle stage of differentiation.**

8 **Supplementary Table 1. Primer sequences.**

9 **Supplementary Table 2. Antibodies used for immunofluorescence assay.**



10 **Supplementary Figure 1. Characterization of the UiPSCs derived from proband 1**  
11 **and proband 2.** (a & b) Immunofluorescence analysis of embryonic stem-cell antigens  
12 Nanog, SSEA4, SOX2, and TRA1-81 in the UiPSCs derived from proband 1 (a) and  
13 proband 2 (b). Scale bar: 50  $\mu\text{m}$ . (c) Alkaline phosphatase (AP) staining of the UiPSCs  
14 derived from proband 1 (left panel) and proband 2 (right panel). Scale bar: 25  $\mu\text{m}$ . (d)  
15 Embryonic body formation assay of the UiPSCs derived from proband 1 (left panel) and  
16 proband 2 (right panel). Scale bar: left panel, 100  $\mu\text{m}$ ; right panel, 250  $\mu\text{m}$ . (e) H&E  
17 staining of the teratomas formed from the UiPSCs derived from proband 1 and 2 in the  
18 NOD/SCID mice. Scale bar: 50  $\mu\text{m}$ . (f & g) Sanger sequencing analysis of the UiPSCs  
19 derived from the affected and unaffected individuals in family 1 (f) and family 2 (g).

# Supplementary Figure 2

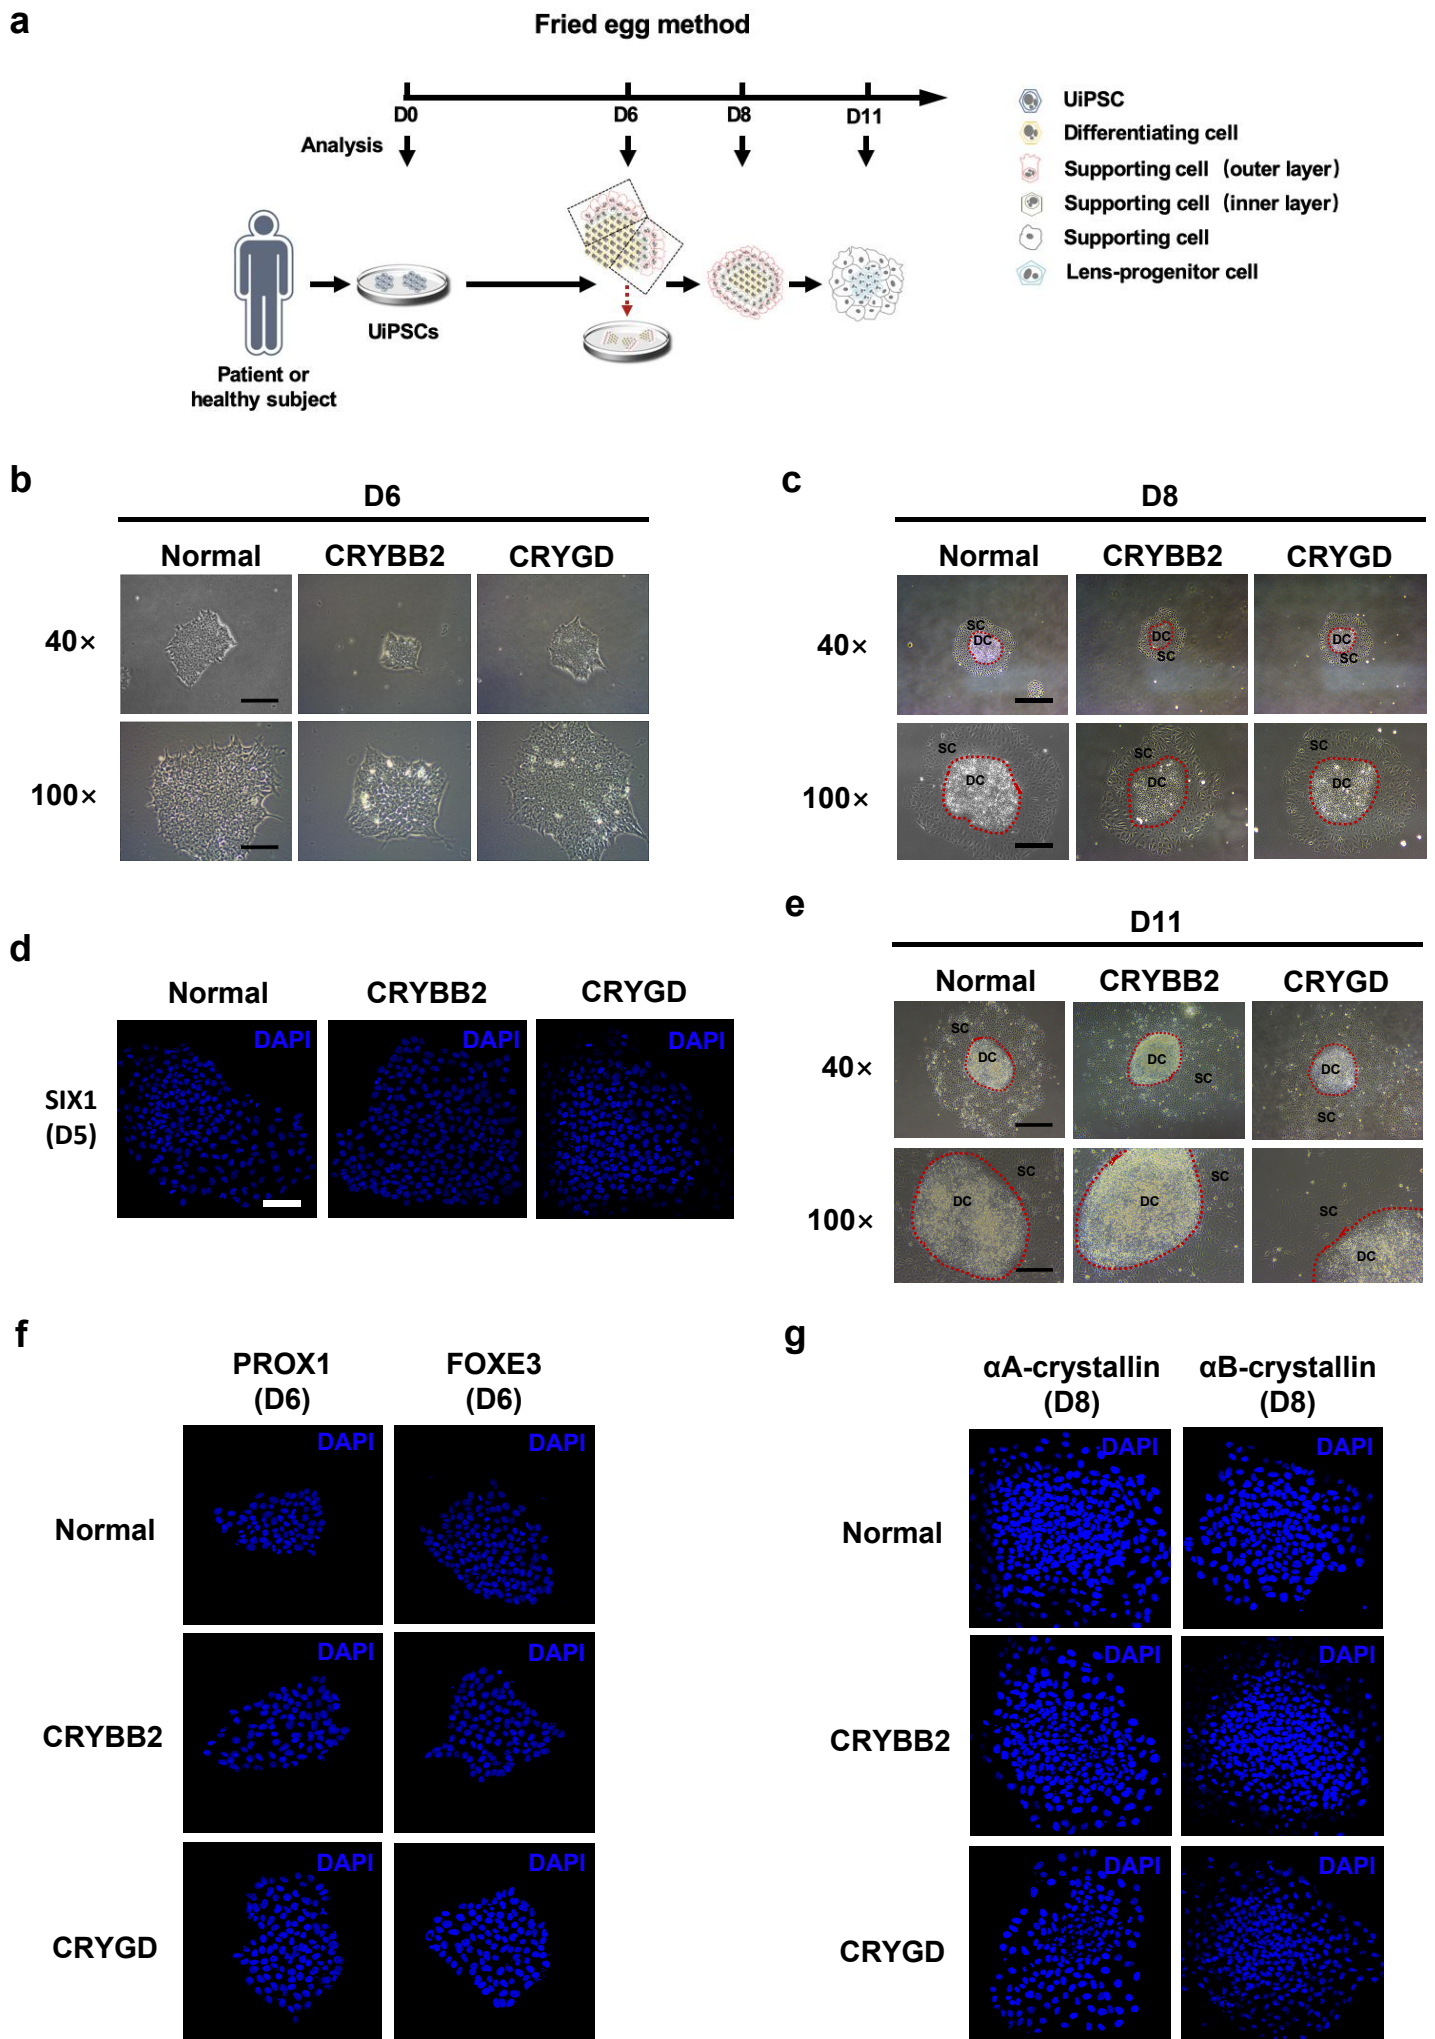

20 **Supplementary Figure 2. Comparative analysis of the differentiation process of**  
21 **the normal, *CRYGD*-, and *CRYBB2*-mutated lentoid bodies (LBs) during the**  
22 **early-middle stage of differentiation.** (a) Schematic of the morphology alteration of  
23 the normal, *CRYGD*-, and *CRYBB2*-mutated LBs during the early-middle stage of  
24 differentiation. (b & c) Representative images of the normal and patient-specific  
25 mutated LBs on D6 (b) and D8 (c). DC: differentiating cells. SC: supporting cells. The  
26 dashed lines indicate the borders between differentiating cells and supporting cells.  
27 Scale bars: 250  $\mu\text{m}$  (upper panels), 100  $\mu\text{m}$  (lower panels). (d) Immunofluorescence  
28 analysis of the placodal marker SIX1 in the normal, the *CRYGD*- and  
29 *CRYBB2*-mutated LBs on D5. Scale bars: 100  $\mu\text{m}$ . (e) Representative images of the  
30 normal and patient-specific mutated LBs on D11. DC: differentiating cells. SC:  
31 supporting cells. The red dashed lines indicate the borders between differentiating  
32 cells and supporting cells. Scale bars: 250  $\mu\text{m}$  (upper panels), 100  $\mu\text{m}$  (lower panels).  
33 (f) Immunofluorescence analysis of the early lens specific markers PROX1 and  
34 FOXE3 in the normal, the *CRYGD*- and *CRYBB2*-mutated LBs on D6. Scale bars: 100  
35  $\mu\text{m}$ . (g) Immunofluorescence analysis of the early lens specific markers  $\alpha\text{A}$ - and  
36  $\alpha\text{B}$ -crystallin in the normal, the *CRYGD*- and *CRYBB2*-mutated LBs on D8. Scale bars:  
37 100  $\mu\text{m}$ .

Supplementary Table 1. Primer sequences.

| Name                              | Direction | Primer sequence (5'→3')    |
|-----------------------------------|-----------|----------------------------|
| <b>Exon amplification</b>         |           |                            |
| CRYBB2 Exon-6                     | Forward   | AGTGGCAATGGTTGGGAGG        |
|                                   | Reverse   | AGTCACACTTTATTCCTCTCTGGGAG |
| CRYGD Exon-2                      | Forward   | AGCTTCCTCCATCGCGG          |
|                                   | Reverse   | CATCCAGTGAGTGTCTGAGGG      |
| <b>Sanger sequencing</b>          |           |                            |
| CRYBB2                            |           | AGTGGCAATGGTTGGGAGG        |
| CRYGD                             |           | AGCTTCCTCCATCGCGG          |
| <b>Quantitative real-time PCR</b> |           |                            |
| CRYAA                             | Forward   | AAGGTGCAGGACGACTTTGT       |
|                                   | Reverse   | GTGGAACCTCACGGGAAATGT      |
| CRYAB                             | Forward   | GTTCTTCGGAGAGCACCTGTT      |
|                                   | Reverse   | GAGAGTCCAGTGTCAAACCAG      |
| CRYBB2                            | Forward   | GCAGGTTCTGTCCTAGTGCAG      |
|                                   | Reverse   | CTCTTGGCTGTCCACTTTGAT      |
| CRYGC                             | Forward   | TGAGCGTCCCAACTACCAAG       |
|                                   | Reverse   | GTGGAGGGAACGGATCTCG        |
| MIP                               | Forward   | GTGCTGTATAGCGTTACCCCA      |
|                                   | Reverse   | CTCGTCGTATGTGGCAAAGAT      |
| PROX1                             | Forward   | AAAGTCAAATGTACTCCGCAAGC    |
|                                   | Reverse   | CTGGGAAATTATGGTTGCTCCT     |
| SOX1                              | Forward   | GCAGGTCCAAGCACTTACAAG      |
|                                   | Reverse   | TATAACTCCGCCGTCTGAAGG      |
| FOXE3                             | Forward   | GCCTCCAGTGAGTCCATA         |
|                                   | Reverse   | AATCTCCAAGAAGTGTCTC        |

---

|       |         |                       |
|-------|---------|-----------------------|
| DLX3  | Forward | CTCGCCCAAGTCGGAATATAC |
|       | Reverse | CTGGTAGCTGGAGTAGATCGT |
| SIX1  | Forward | CTGCCGTCGTTTGGCTTTAC  |
|       | Reverse | GCTCTCGTTCTTGTGCAGGT  |
| PAX6  | Forward | TTTGCCCGAGAAAGACTAGC  |
|       | Reverse | CATTTGGCCCTTCGATTAGA  |
| GADPH | Forward | ATTGCCCTCAACGACCACT   |
|       | Reverse | ATGAGGTCCACCACCCTGT   |

---

Supplementary Table 2. Antibodies used for immunofluorescence assay.

| Antibody                                              | Brand          | Cat No.     | Source | Dilution |
|-------------------------------------------------------|----------------|-------------|--------|----------|
| <b>Primary Antibodies</b>                             |                |             |        |          |
| $\alpha$ A-Crystallin polyclonal antibody             | ENZO           | ADI-SPA-221 | Rabbit | 1:100    |
| $\alpha$ B-Crystallin monoclonal antibody (1B6.1-3G4) | ENZO           | ADI-SPA-222 | Mouse  | 1:100    |
| $\beta$ -Crystallin antibody                          | Santa Cruz     | sc-22745    | Rabbit | 1:100    |
| $\gamma$ -Crystallin antibody                         | Santa Cruz     | sc-22746    | Rabbit | 1:100    |
| MIP (AQP40) antibody                                  | Santa Cruz     | sc-99059    | Rabbit | 1:100    |
| SIX1 (D4A8K) Rabbit mAb                               | Cell Signaling | 12891       | Rabbit | 1:100    |
| E-Cadherin (24E10) Rabbit mAb                         | Cell Signaling | 3195        | Rabbit | 1:100    |
| Anti-FOXE3 antibody produced in rabbit                | Sigma-Aldrich  | AV32304     | Rabbit | 1:100    |
| PROX1 (D2J6J) Rabbit mAb                              | Abcam          | 14963       | Rabbit | 1:100    |
| Anti-Collagen IV antibody                             | Abcam          | Ab6586      | Rabbit | 1:100    |
| Anti-SOX2 antibody                                    | Millipore      | AB5603      | Rabbit | 1:250    |



|                                                                                              |                |           |        |        |
|----------------------------------------------------------------------------------------------|----------------|-----------|--------|--------|
| Human Nanog Antibody                                                                         | R&D            | AF1997    | Goat   | 1:75   |
| Anti-SSEA4 antibody [MC813]                                                                  | Abcam          | ab16287   | Mouse  | 1:75   |
| Anti-TRA1-81 Antibody, clone TRA-1-81, Cy3 conjugate                                         | Millipore      | MAB4381C3 | Mouse  | 1:100  |
| <b>Secondary Antibodies</b>                                                                  |                |           |        |        |
| Anti-rabbit IgG (H+L), F(ab') <sub>2</sub> Fragment (Alexa Fluor <sup>®</sup> 555 Conjugate) | Cell Signaling | 4413      | Goat   | 1:1000 |
| Anti-mouse IgG (H+L), F(ab') <sub>2</sub> Fragment (Alexa Fluor <sup>®</sup> 555 Conjugate)  | Cell Signaling | 4409      | Goat   | 1:1000 |
| Anti-rabbit IgG (H+L), F(ab') <sub>2</sub> Fragment (Alexa Fluor <sup>®</sup> 488 Conjugate) | Cell Signaling | 4412      | Goat   | 1:1000 |
| Anti-mouse IgG (H+L), F(ab') <sub>2</sub> Fragment (Alexa Fluor <sup>®</sup> 488 Conjugate)  | Cell Signaling | 4408      | Goat   | 1:1000 |
| Donkey anti-Goat IgG (H+L) Cross-Adsorbed Secondary Antibody, Alexa Fluor 555                | Invitrogen     | A-21432   | Donkey | 1:1000 |
