# Supplementary material for: Modeling congenital cataract in vitro using patient-specific induced pluripotent stem cells
Source: PubMed Central journal article supplement (PMC8486789; doi:10.1038/s41536-021-00171-x), 2021-10-01
Supplement: 41536_2021_171_MOESM2_ESM.pdf [file 41536_2021_171_MOESM2_ESM.pdf]

## Reporting Summary

Nature Portfolio wishes to improve the reproducibility of the work that we publish. This form provides structure for consistency and transparency in reporting. For further information on Nature Portfolio policies, see our [Editorial Policies](#) and the [Editorial Policy Checklist](#).

Please do not complete any field with "not applicable" or n/a. Refer to the help text for what text to use if an item is not relevant to your study. For final submission: please carefully check your responses for accuracy; you will not be able to make changes later.

### Statistics

For all statistical analyses, confirm that the following items are present in the figure legend, table legend, main text, or Methods section.

n/a Confirmed

- The exact sample size ( $n$ ) for each experimental group/condition, given as a discrete number and unit of measurement
- A statement on whether measurements were taken from distinct samples or whether the same sample was measured repeatedly
- The statistical test(s) used AND whether they are one- or two-sided  
*Only common tests should be described solely by name; describe more complex techniques in the Methods section.*
- A description of all covariates tested
- A description of any assumptions or corrections, such as tests of normality and adjustment for multiple comparisons
- A full description of the statistical parameters including central tendency (e.g. means) or other basic estimates (e.g. regression coefficient) AND variation (e.g. standard deviation) or associated estimates of uncertainty (e.g. confidence intervals)
- For null hypothesis testing, the test statistic (e.g.  $F$ ,  $t$ ,  $r$ ) with confidence intervals, effect sizes, degrees of freedom and  $P$  value noted  
*Give  $P$  values as exact values whenever suitable.*
- For Bayesian analysis, information on the choice of priors and Markov chain Monte Carlo settings
- For hierarchical and complex designs, identification of the appropriate level for tests and full reporting of outcomes
- Estimates of effect sizes (e.g. Cohen's  $d$ , Pearson's  $r$ ), indicating how they were calculated

*Our web collection on [statistics for biologists](#) contains articles on many of the points above.*

### Software and code

Policy information about [availability of computer code](#)

Data collection

Data analysis

For manuscripts utilizing custom algorithms or software that are central to the research but not yet described in published literature, software must be made available to editors and reviewers. We strongly encourage code deposition in a community repository (e.g. GitHub). See the Nature Portfolio [guidelines for submitting code & software](#) for further information.

### Data

Policy information about [availability of data](#)

All manuscripts must include a [data availability statement](#). This statement should provide the following information, where applicable:

- Accession codes, unique identifiers, or web links for publicly available datasets
- A description of any restrictions on data availability
- For clinical datasets or third party data, please ensure that the statement adheres to our [policy](#)

## Field-specific reporting

Please select the one below that is the best fit for your research. If you are not sure, read the appropriate sections before making your selection.

- Life sciences     Behavioural & social sciences     Ecological, evolutionary & environmental sciences

## Life sciences study design

All studies must disclose on these points even when the disclosure is negative.

|                 |                                                                                                                                                                                                                       |
|-----------------|-----------------------------------------------------------------------------------------------------------------------------------------------------------------------------------------------------------------------|
| Sample size     | The data are acquired from experiments from at least three parallel samples per group. Though no sample-size calculation was performed, replication from at least three parallel samples is acknowledged as adequate. |
| Data exclusions | No data were excluded.                                                                                                                                                                                                |
| Replication     | The reproducibility of data has been confirmed by replication of at least three parallel samples per group.                                                                                                           |
| Randomization   | This is not relevant to the present study since the experimental and control groups were determined according to the iPSCs derived from patients and healthy individuals, respectively.                               |
| Blinding        | The LB opacification quantification was performed by three ophthalmologists independently using a blind method. Blinding was not relevant to other assays since there is no potential bias.                           |

## Reporting for specific materials, systems and methods

We require information from authors about some types of materials, experimental systems and methods used in many studies. Here, indicate whether each material, system or method listed is relevant to your study. If you are not sure if a list item applies to your research, read the appropriate section before selecting a response.

### Materials & experimental systems

| n/a                                 | Involved in the study                                           |
|-------------------------------------|-----------------------------------------------------------------|
| <input type="checkbox"/>            | <input checked="" type="checkbox"/> Antibodies                  |
| <input checked="" type="checkbox"/> | <input type="checkbox"/> Eukaryotic cell lines                  |
| <input checked="" type="checkbox"/> | <input type="checkbox"/> Palaeontology and archaeology          |
| <input type="checkbox"/>            | <input checked="" type="checkbox"/> Animals and other organisms |
| <input type="checkbox"/>            | <input checked="" type="checkbox"/> Human research participants |
| <input checked="" type="checkbox"/> | <input type="checkbox"/> Clinical data                          |
| <input checked="" type="checkbox"/> | <input type="checkbox"/> Dual use research of concern           |

### Methods

| n/a                                 | Involved in the study                           |
|-------------------------------------|-------------------------------------------------|
| <input checked="" type="checkbox"/> | <input type="checkbox"/> ChIP-seq               |
| <input checked="" type="checkbox"/> | <input type="checkbox"/> Flow cytometry         |
| <input checked="" type="checkbox"/> | <input type="checkbox"/> MRI-based neuroimaging |

## Antibodies

### Antibodies used

αA-Crystallin polyclonal antibody ENZO ADI-SPA-221  
 αB-Crystallin monoclonal antibody (1B6.1-3G4) ENZO ADI-SPA-222  
 β-Crystallin antibody Santa Cruz sc-22745  
 γ-Crystallin antibody Santa Cruz sc-22746  
 MIP (AQP40) antibody Santa Cruz sc-99059  
 SIX1 (D4A8K) Rabbit mAb Cell Signaling 12891  
 E-Cadherin (24E10) Rabbit mAb Cell Signaling 3195  
 Anti-FOXE3 antibody produced in rabbit Sigma-Aldrich AV32304  
 PROX1 (D2J6J) Rabbit mAb Abcam 14963  
 Anti-Collagen IV antibody Abcam Ab6586  
 Anti-SOX2 antibody Millipore AB5603  
 Human Nanog Antibody R&D AF1997  
 Anti-SSEA4 antibody [MC813] Abcam ab16287  
 Anti-TRA1-81 Antibody, clone TRA-1-81, Cy3 conjugate Millipore MAB4381C3  
 Anti-rabbit IgG (H+L), F(ab')<sub>2</sub> Fragment (Alexa Fluor®555 Conjugate) Cell Signaling 4413  
 Anti-mouse IgG (H+L), F(ab')<sub>2</sub> Fragment (Alexa Fluor®555 Conjugate) Cell Signaling 4409  
 Anti-rabbit IgG (H+L), F(ab')<sub>2</sub> Fragment (Alexa Fluor®488 Conjugate) Cell Signaling 4412  
 Anti-mouse IgG (H+L), F(ab')<sub>2</sub> Fragment (Alexa Fluor®488 Conjugate) Cell Signaling 4408  
 Donkey anti-Goat IgG (H+L) Cross-Adsorbed Secondary Antibody, Alexa Fluor 555 Invitrogen A-21432

### Validation

All primary antibodies have been validated.

## Animals and other organisms

Policy information about [studies involving animals](#); [ARRIVE guidelines](#) recommended for reporting animal research

|                         |                                                                                                                                                                                                                                                                                                                                                                                                                                                                    |
|-------------------------|--------------------------------------------------------------------------------------------------------------------------------------------------------------------------------------------------------------------------------------------------------------------------------------------------------------------------------------------------------------------------------------------------------------------------------------------------------------------|
| Laboratory animals      | NOD/SCID mice                                                                                                                                                                                                                                                                                                                                                                                                                                                      |
| Wild animals            | The study did not involve wild animals.                                                                                                                                                                                                                                                                                                                                                                                                                            |
| Field-collected samples | The mice were housed in a standard environment with a temperature of 20 to 24°C and a humidity of 50 to 60% under a 12-hour light-dark cycle with food and water provided ad libitum. UiPSCs were injected into the muscle center in the hind-leg quadriceps along the long axis of the mice. Animals were sacrificed with intraperitoneal injection of an overdose of 2% pentobarbital sodium for isolation of tumors , usually at 6-8 weeks after the injection. |
| Ethics oversight        | All animal experiments were approved by the Institutional Animal Care and Use Committee at Zhejiang University.                                                                                                                                                                                                                                                                                                                                                    |

Note that full information on the approval of the study protocol must also be provided in the manuscript.

## Human research participants

Policy information about [studies involving human research participants](#)

|                            |                                                                                                                                                               |
|----------------------------|---------------------------------------------------------------------------------------------------------------------------------------------------------------|
| Population characteristics | Congenital cataract patients and healthy individuals without urinary tract diseases or other ocular diseases were recruited.                                  |
| Recruitment                | Subjects were recruited in outpatient department. No potential bias is involved.                                                                              |
| Ethics oversight           | The study protocol was approved by the Medical Ethics Committee of the Second Affiliated Hospital of Zhejiang University School of Medicine, Hangzhou, China. |

Note that full information on the approval of the study protocol must also be provided in the manuscript.
